# Supplementary material for: SOX2 recruits KLF4 to regulate nasopharyngeal carcinoma proliferation via PI3K/AKT signaling
Source: PubMed Central journal article supplement (PMC6092437; doi:10.1038/s41389-018-0074-2), 2018-08-15
Supplement: 41389_2018_74_MOESM2_ESM.pdf [file 41389_2018_74_MOESM2_ESM.pdf]

**A**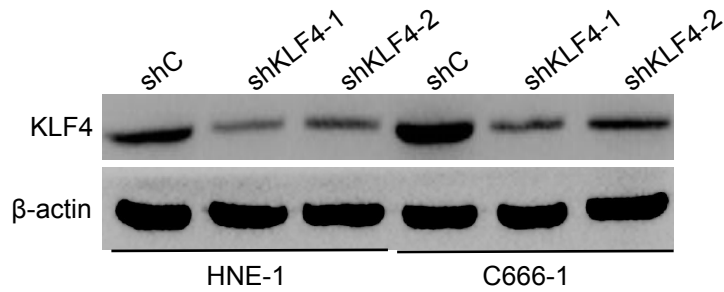**B**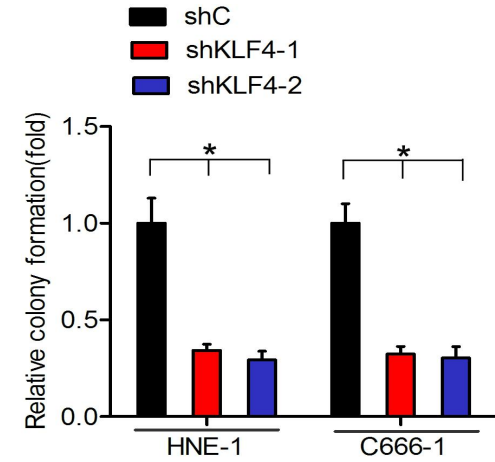**C**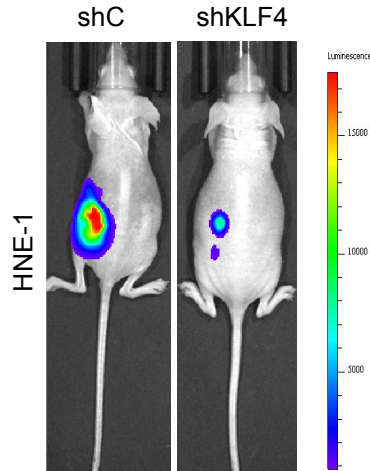**D**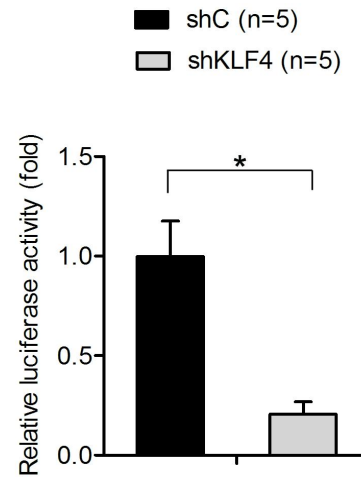

### Supplementary Figure 2 Depletion of KLF4 inhibits nasopharyngeal carcinoma growth

(A) Western blot analysis of KLF4 knockdown in HNE-1 and C666-1 cells. (B) Effects of KLF4 knockdown on nasopharyngeal carcinoma cell colony formation. (C) Representative bioluminescence images of KLF4 knockdown-inhibited HNE-1 subcutaneous tumour generation. (D) Quantification of the bioluminescence activity in C.
